# Supplementary material for: Measurement Properties of Smartphone Approaches to Assess Diet, Alcohol Use, and Tobacco Use: Systematic Review
Source: PubMed Central journal article supplement (PMC8895282; doi:10.2196/27337), 2022-02-17
Supplement: mhealth_v10i2e27337_app1.pdf [file mhealth_v10i2e27337_app1.pdf]

## Multimedia appendix 1. Medline Search Strategy

| #  | Searches                                                                                                                                                                                                                                                                                                        |
|----|-----------------------------------------------------------------------------------------------------------------------------------------------------------------------------------------------------------------------------------------------------------------------------------------------------------------|
| 1  | exp Exercise/                                                                                                                                                                                                                                                                                                   |
| 2  | exp sports/                                                                                                                                                                                                                                                                                                     |
| 3  | exp dancing/                                                                                                                                                                                                                                                                                                    |
| 4  | exp physical exertion/                                                                                                                                                                                                                                                                                          |
| 5  | recreation/                                                                                                                                                                                                                                                                                                     |
| 6  | exp healthy lifestyle/                                                                                                                                                                                                                                                                                          |
| 7  | (fitness or exercis* or sport* or game* or aerobic* or run or runs or running or walk or walks or walking or jumping or outdoor* or bicycle* or biking or jog*).ti,ab.                                                                                                                                          |
| 8  | (physical* adj2 (fit* or train* or endur* or activ* or inactivit* or energy)).ti,ab.                                                                                                                                                                                                                            |
| 9  | (exercis* adj2 (train* or physical* or activ*)).ti,ab.                                                                                                                                                                                                                                                          |
| 10 | (insufficient* adj2 (activ* or energy)).ti,ab.                                                                                                                                                                                                                                                                  |
| 11 | ((lifestyle* or life-style*) <b>adj2</b> (activ* or physical* or healthy)).ti,ab.                                                                                                                                                                                                                               |
| 12 | 1 or 2 or 3 or 4 or 5 or 6 or 7 or 8 or 9 or 10 or 11                                                                                                                                                                                                                                                           |
| 13 | exp "Diet, Food, and Nutrition"/                                                                                                                                                                                                                                                                                |
| 14 | exp nutrition disorders/                                                                                                                                                                                                                                                                                        |
| 15 | (diet* or eat* or nutrition* or meal* or food* or lunch* or breakfast* or dinner* or supper or snack* or fruit* or vegetable* or sugar* or salt* or appetite* or overeat* or over-eat* or overnutrit* or over-nutrit* or overweight or over-weight or obese or obesity or overnourish* or over-nourish*).ti,ab. |
| 16 | 13 or 14 or 15                                                                                                                                                                                                                                                                                                  |
| 17 | exp sedentary lifestyle/                                                                                                                                                                                                                                                                                        |
| 18 | Leisure activities/                                                                                                                                                                                                                                                                                             |
| 19 | exp relaxation/                                                                                                                                                                                                                                                                                                 |
| 20 | exp hobbies/                                                                                                                                                                                                                                                                                                    |
| 21 | exp "play and playthings"/                                                                                                                                                                                                                                                                                      |
| 22 | (sedentary adj2 (lifestyle* or life-style* or behaviour* or behaviour* or web brows*)).ti,ab.                                                                                                                                                                                                                   |
| 23 | ((watch*) adj3 (television OR TV)).ti,ab.                                                                                                                                                                                                                                                                       |
| 24 | ((video game* adj3 play*) or video gaming).ti,ab.                                                                                                                                                                                                                                                               |
| 25 | ((electronic* or computer* or media) adj2 (game* or us* or play* or time*)).ti,ab.                                                                                                                                                                                                                              |
| 26 | (screen adj2 (time* or recreation* or view* or activit*)).ti,ab.                                                                                                                                                                                                                                                |
| 27 | 17 or 18 or 19 or 20 or 21 or 22 or 23 or 24 or 25 or 26                                                                                                                                                                                                                                                        |
| 28 | exp "Tobacco Use Disorder"/                                                                                                                                                                                                                                                                                     |
| 29 | exp smoking/                                                                                                                                                                                                                                                                                                    |
| 30 | (cigarette* or smok* or tobacco or vaping or vape* or eCig* or e-cig* or electronic cig*).ti,ab.                                                                                                                                                                                                                |
| 31 | 28 or 29 or 30                                                                                                                                                                                                                                                                                                  |

|    |                                                                                                                                                                                                                                                                                                                                                                                                                                            |
|----|--------------------------------------------------------------------------------------------------------------------------------------------------------------------------------------------------------------------------------------------------------------------------------------------------------------------------------------------------------------------------------------------------------------------------------------------|
| 32 | exp Drinking Behavior/                                                                                                                                                                                                                                                                                                                                                                                                                     |
| 33 | (alcoholic* or intoxication or liquor or hangover*).ti,ab.                                                                                                                                                                                                                                                                                                                                                                                 |
| 34 | (alcohol* adj3 (abus* or us* or disorder* or consum* or drink* or heav* or problem* or excess* or bing* or risk* or reckless*).ti,ab.                                                                                                                                                                                                                                                                                                      |
| 35 | (drink* adj3 (alcohol* or abus* or us* or disorder* or consum* or heav* or problem* or excess* or bing* or risk* or reckless*).ti,ab.                                                                                                                                                                                                                                                                                                      |
| 36 | 32 or 33 or 34 or 35                                                                                                                                                                                                                                                                                                                                                                                                                       |
| 37 | exp sleep/                                                                                                                                                                                                                                                                                                                                                                                                                                 |
| 38 | (sleep* or insomnia* or wakeful* or restless* or Chronotype).ti,ab.                                                                                                                                                                                                                                                                                                                                                                        |
| 39 | 37 or 38                                                                                                                                                                                                                                                                                                                                                                                                                                   |
| 40 | 12 or 18 or 27 or 31 or 36 or 39                                                                                                                                                                                                                                                                                                                                                                                                           |
| 41 | exp Cell Phones/                                                                                                                                                                                                                                                                                                                                                                                                                           |
| 42 | exp Smartphone/                                                                                                                                                                                                                                                                                                                                                                                                                            |
| 43 | exp Mobile Applications/                                                                                                                                                                                                                                                                                                                                                                                                                   |
| 44 | ((cell* or smart* or mobile or Google OR sidekick) adj3 (app or application or apps or applications or phone*).ti,ab.                                                                                                                                                                                                                                                                                                                      |
| 45 | (smartphone* or sidekick or android* or iphone*).ti,ab.                                                                                                                                                                                                                                                                                                                                                                                    |
| 46 | ((smart phone* or cell* phone* or mobile phone* or application or applications or app or apps) adj3 (fitbit or fitbits or pedomet* or actigraphy or acceleromet* or mHealth or m-health or mobile health or e-health or "electronic health" or ehealth or telehealth or telehealth)).ti,ab.                                                                                                                                                |
| 47 | 41 or 42 or 43 or 44 or 45 or 46                                                                                                                                                                                                                                                                                                                                                                                                           |
| 48 | exp "Outcome Assessment (Health Care)"/                                                                                                                                                                                                                                                                                                                                                                                                    |
| 49 | exp Observer Variation/                                                                                                                                                                                                                                                                                                                                                                                                                    |
| 50 | exp Health Status Indicators/                                                                                                                                                                                                                                                                                                                                                                                                              |
| 51 | exp "Reproducibility of Results"/                                                                                                                                                                                                                                                                                                                                                                                                          |
| 52 | exp Discriminant Analysis/                                                                                                                                                                                                                                                                                                                                                                                                                 |
| 53 | (instrumentation or methods).sh.                                                                                                                                                                                                                                                                                                                                                                                                           |
| 54 | (Validation Studies or Comparative Study).pt.                                                                                                                                                                                                                                                                                                                                                                                              |
| 55 | "outcome assessment".ti,ab.                                                                                                                                                                                                                                                                                                                                                                                                                |
| 56 | "outcome measure*".ti,ab.                                                                                                                                                                                                                                                                                                                                                                                                                  |
| 57 | "observer variation".ti,ab.                                                                                                                                                                                                                                                                                                                                                                                                                |
| 58 | ((reproducib* or coefficient or homogeneity or homogeneous or "internal consistency" or error or errors or replicab* or repeated or variability or sensitiv*) adj5 (measure or measures or measurement or measurements or findings or finding or results or result or test or tests or testing or retest or instrument or instruments or instrumentation or scale or scaling or scales or analysis or analyses or value or values)).ti,ab. |
| 59 | (reliab* or unreliab* or valid*).ti,ab.                                                                                                                                                                                                                                                                                                                                                                                                    |
| 60 | (cronbach* and (alpha or alphas)).ti,ab.                                                                                                                                                                                                                                                                                                                                                                                                   |
| 61 | (item adj3 (correlation* or selection* or reduction*)).ti,ab.                                                                                                                                                                                                                                                                                                                                                                              |

|    |                                                                                                                                                                                                                                     |
|----|-------------------------------------------------------------------------------------------------------------------------------------------------------------------------------------------------------------------------------------|
| 62 | (precision or imprecision or "precise values" or generaliza* or generalisa* or concordance or "item discriminant" or "interscale correlation*" or "individual variability").ti,ab.                                                  |
| 63 | (test* adj2 retest*).ti,ab.                                                                                                                                                                                                         |
| 64 | (intraclass correlation*).ti,ab.                                                                                                                                                                                                    |
| 65 | ((multitrait and scaling) and (analysis or analyses)).ti,ab.                                                                                                                                                                        |
| 66 | ((uncertainty or uncertainties) adj2 (measurement or measuring)).ti,ab.                                                                                                                                                             |
| 67 | ((minimal or minimally or clinical or clinically) adj5 (important or importance or significant or significance or detectable or real) adj5 (change or difference)).ti,ab.                                                           |
| 68 | ("meaningful change" or "ceiling effect" or "floor effect" or "Item response model" or IRT or Rasch or "Differential item functioning" or DIF or "computer adaptive testing" or "item bank" or "cross-cultural equivalence").ti,ab. |
| 69 | 48 or 49 or 50 or 51 or 52 or 53 or 54 or 55 or 56 or 57 or 58 or 59 or 60 or 61 or 62 or 63 or 64 or 65 or 66 or 67 or 68                                                                                                          |
| 70 | 40 and 47 and 69                                                                                                                                                                                                                    |
| 71 | limit 70 to yr="2007 - 2018"                                                                                                                                                                                                        |
